# Supplementary material
Source: PubMed Central journal article supplement (PMC6606352)
Supplement: NIHMS1524233-supplement-1.pdf [file NIHMS1524233-supplement-1.pdf]

A.

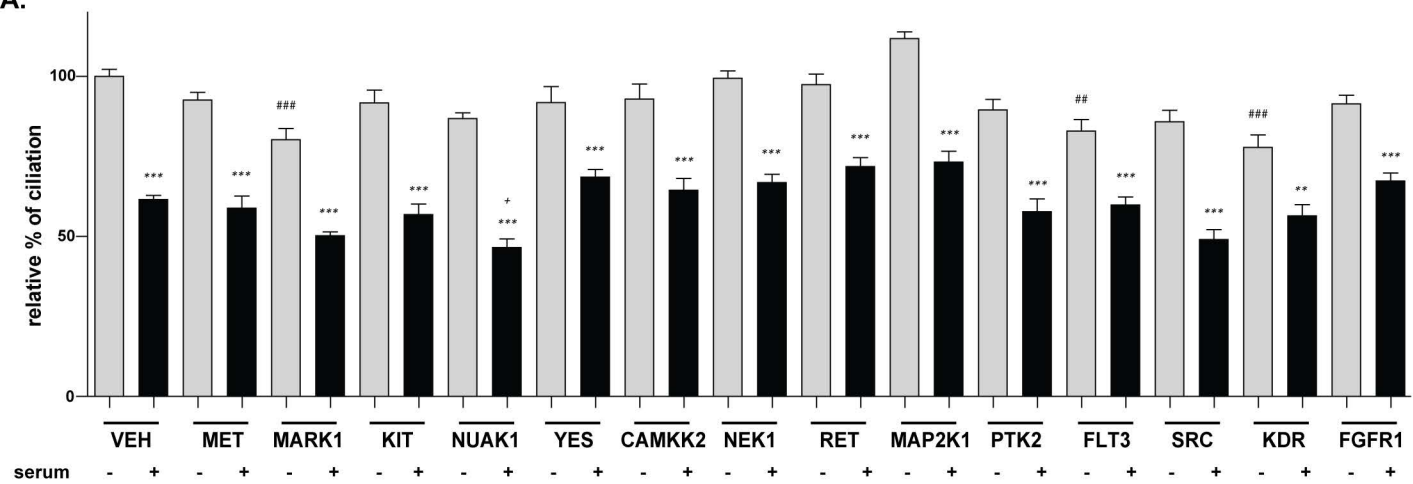

B.

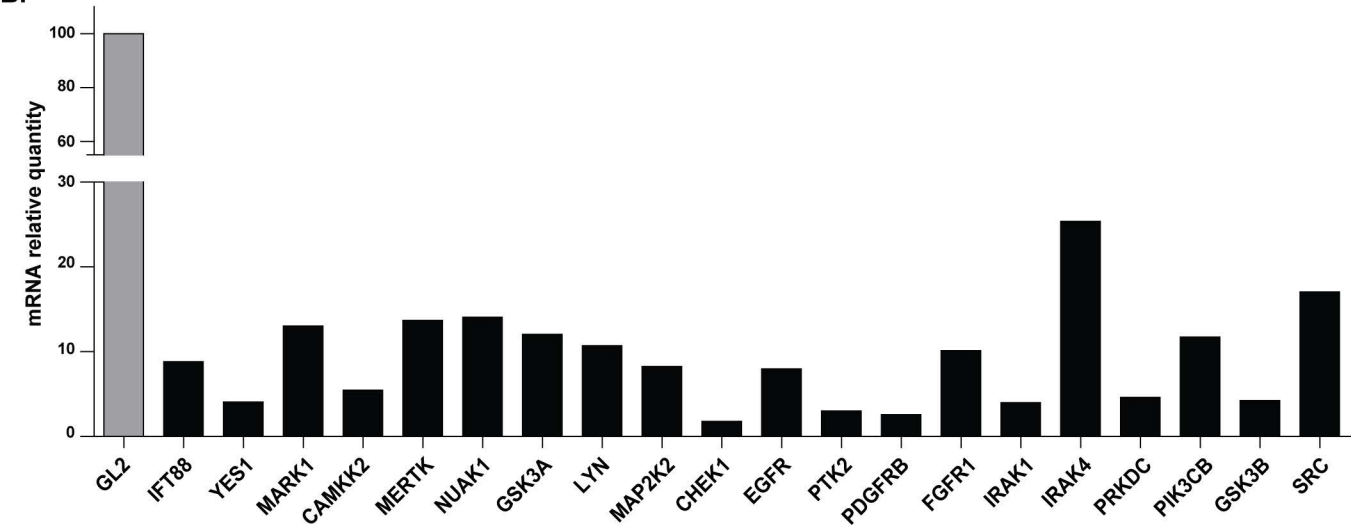

**Supplementary Figure S1. Additional analysis of siRNA effects on ciliation and target depletion.** **A.** Candidate protein kinase inhibitor targets that did not affect ciliation. For each datapoint,  $n \geq 500$  cells (250 from each of two biological repetitions, visualized by confocal), with data analyzed by Tukey test. \*,  $p < 0.5$ ; \*\*,  $p < 0.01$ ; \*\*\*,  $p < 0.001$ , for each siRNA in serum versus no serum conditions. #,  $p < 0.5$ ; ##,  $p < 0.01$ ; ###,  $p < 0.001$ , relative to vehicle, no serum. +,  $p < 0.5$ ; ++,  $p < 0.01$ ; +++,  $p < 0.001$ , relative to vehicle plus serum. **B.** Quantitative RT-PCR to determine degree of target depletion 48 hours following transfection with the indicated siRNAs; all data normalized to mRNA encoding the ribosomal protein 36B4.

A.

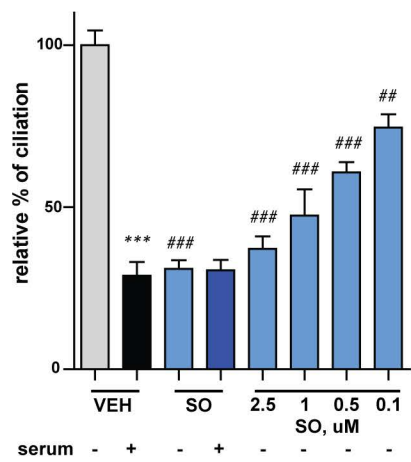

B.

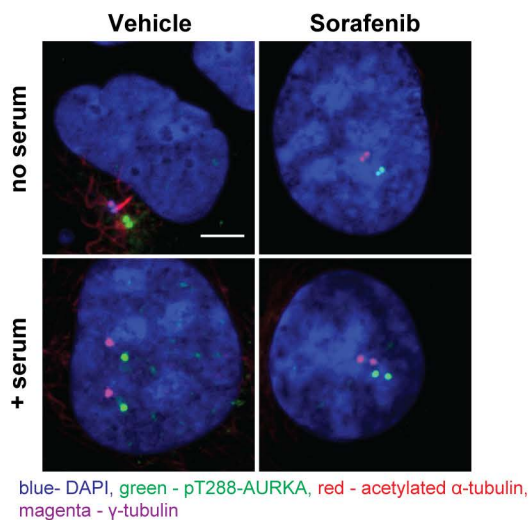

**Supplementary Figure S2. Sorafenib is similar to sunitinib in inducing ciliary resorption. A., B.** Ciliation rates (A) and T288ph-AURKA (B) images of hTERT-RPE1 cell line upon treatment with sorafenib. Green, T288ph -AURKA; red, acetylated  $\alpha$ -tubulin; magenta,  $\gamma$ -tubulin; signal for T288ph-AURKA and basal body are offset for clarity; (n $\geq$ 750 cells). Significance calculated by Tukey test, from three independent experiments; \*, p <0.5; \*\*, p <0.01; \*\*\*, p<0.001, for each drug or siRNA in serum versus no serum conditions. #, p <0.5; ##, p <0.01; ###, p<0.001, relative to vehicle, no serum.

**A.**

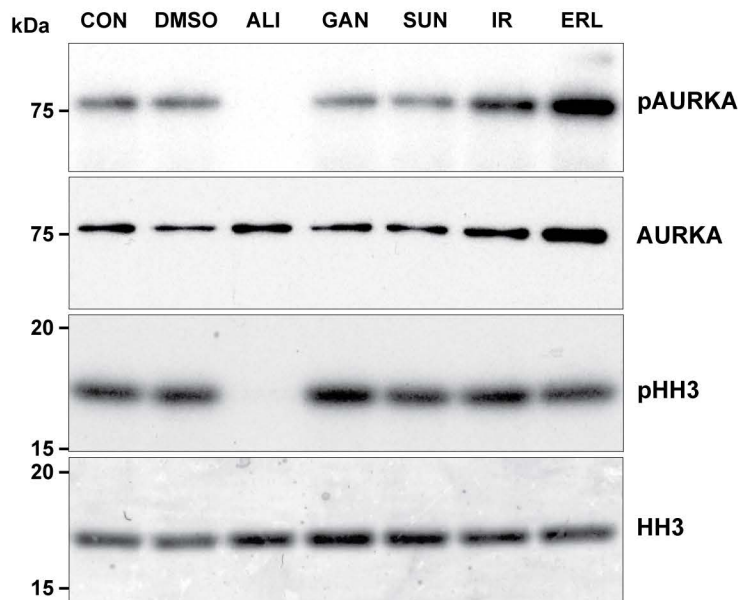

**B.**

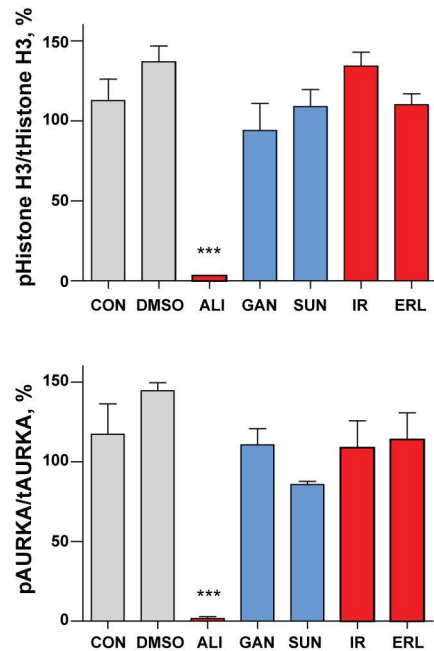

**Supplementary Figure S3. Effect of compounds on AURKA catalytic activity.** Representative WB images (A) and quantification of *in vitro* kinase assay (B) demonstrating alisertib inhibits AURKA autophosphorylation and phosphorylation of histone H3 (HH3), but other drugs tested do not, gauged by *in vitro* kinase assay with  $^{32}$ P-ATP. Total AURKA is visualized by antibody, and HH3 by Coomassie blue. CON, no drug diluent; GAN, ganetespib; SUN, sunitinib; IR, IRAK1/4i; ERL, erlotinib. Significance calculated by Tukey test, from three independent experiments; \*\*\*,  $p < 0.001$ .

**A.****Sunitinib treatment**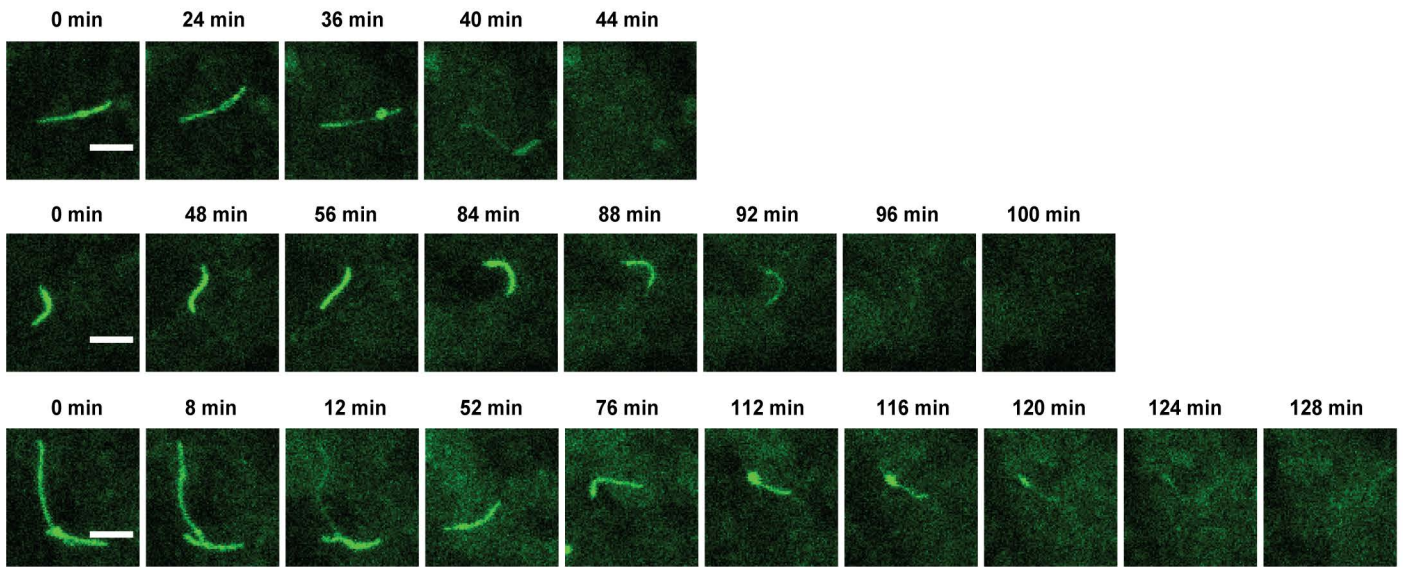**B.****Ganetespib treatment**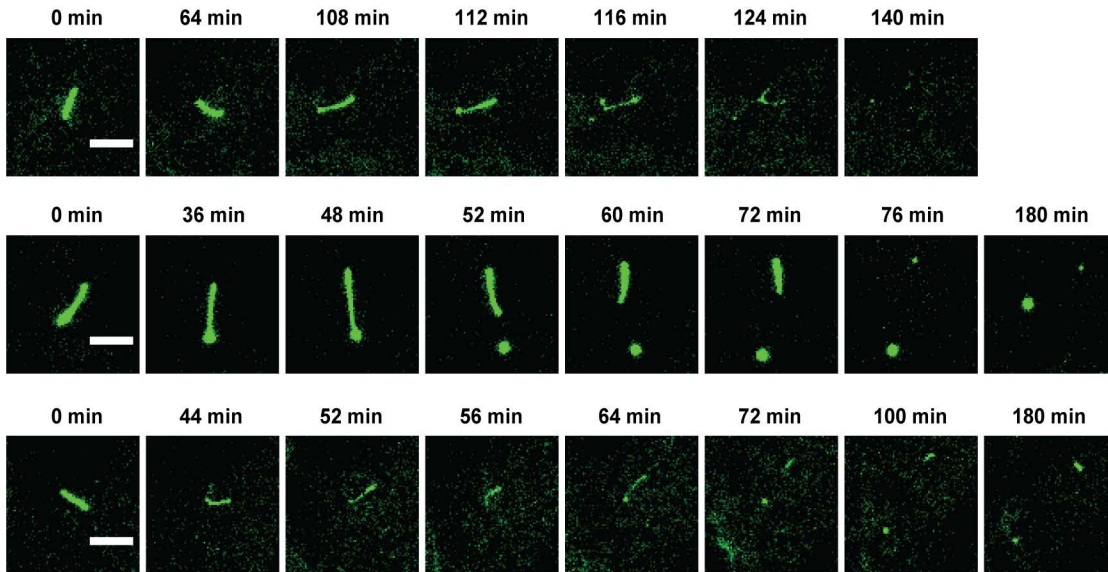

**Supplementary Figure S4. Representative images demonstrating the effect of sunitinib (A) and ganetespib (B) on cilia resorption in hTERT-RPE1-Arl13b-GFP cells. Three examples are shown; green stain reflects Arl13b-GFP signal. Scale bar, 5  $\mu$ m.**

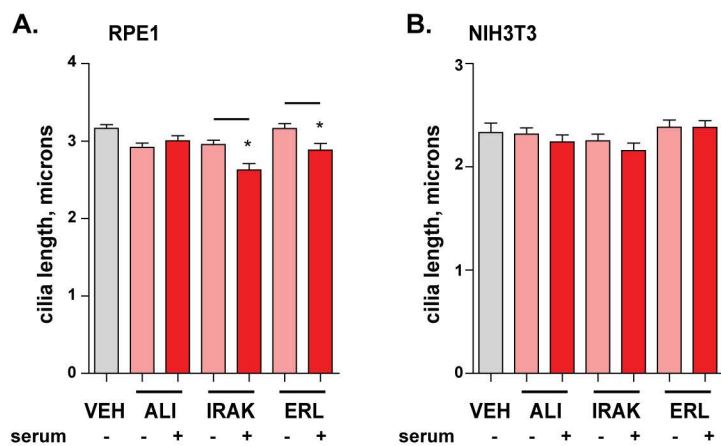

**Supplementary Figure S5.** Cilia length upon treatment with indicated cilia-stabilizing compounds in hTERT-RPE1 (**A**) and NIH3T3 (**B**) cell lines.  $n \geq 150$  cells (in each of 2 independent repetitions), based on Tukey test. \*,  $p < 0.05$ ; \*\*,  $p < 0.01$ ; \*\*\*,  $p < 0.001$ , for each drug in serum versus no serum conditions.

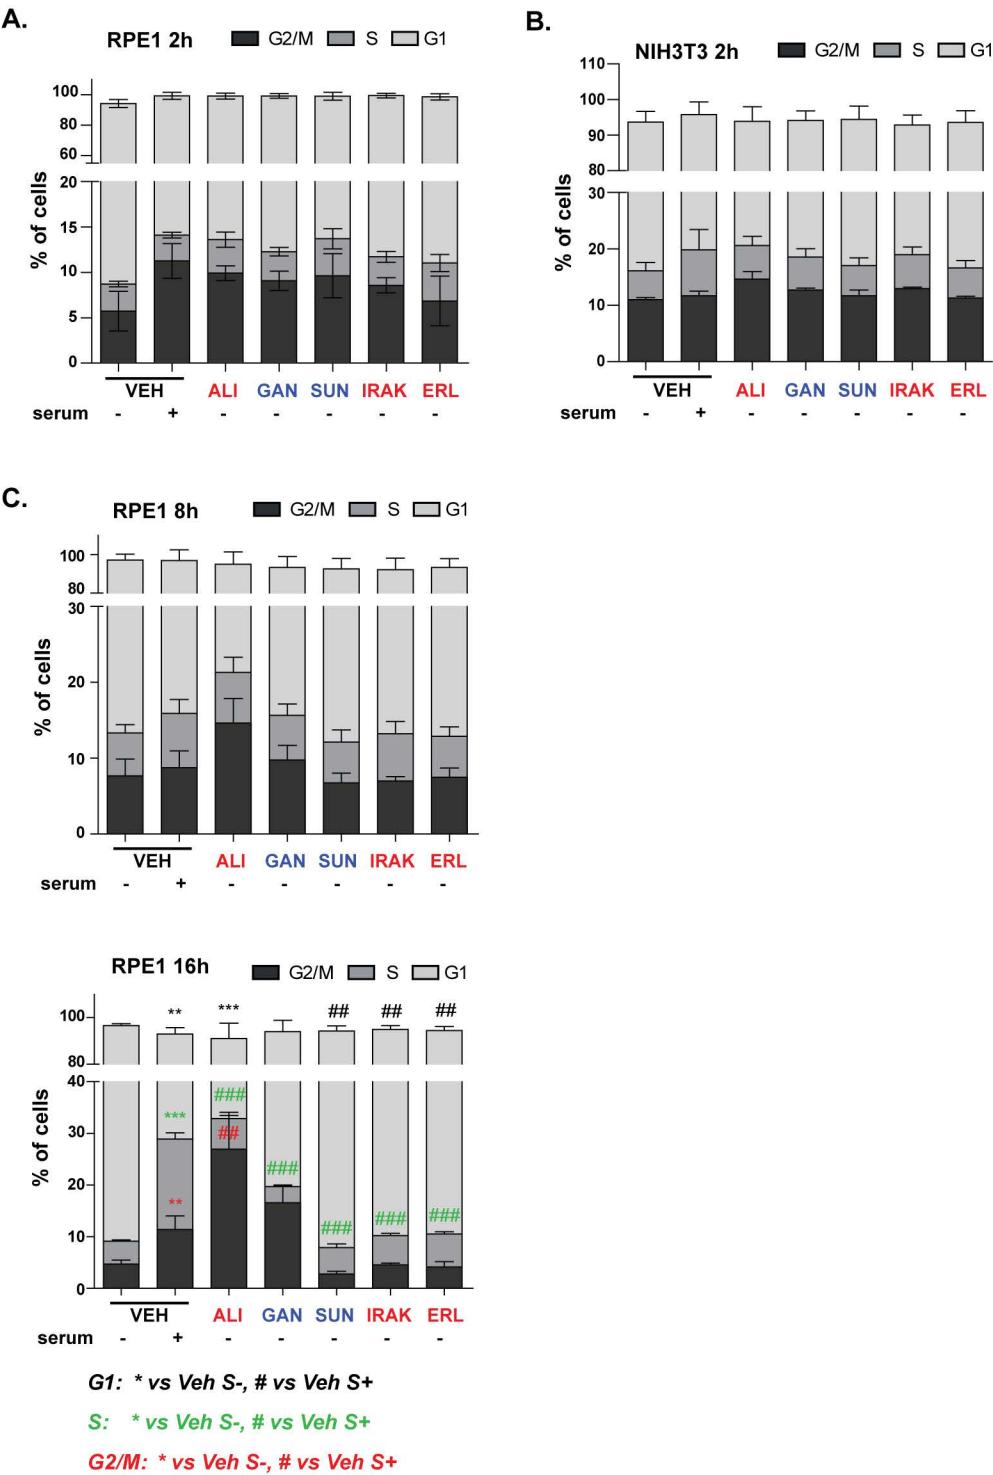

**Supplementary Figure S6. Drug effects on ciliation correspond to changes in cell cycle over time.** Cell cycle distribution of hTERT-RPE1 (**A**) and NIH3T3 (**B**) cells treated for 2.5 hours with the indicated drugs, based on FACS. (**C**) Cell cycle distribution of hTERT-RPE1 cells treated for 8 and 16 hours with the indicated drugs. Significance calculated by Tukey test in all cases, from three independent experiments. \* or #,  $p < 0.5$ ; \*\* or ##,  $p < 0.01$ ; \*\*\* or ###,  $p < 0.001$ .

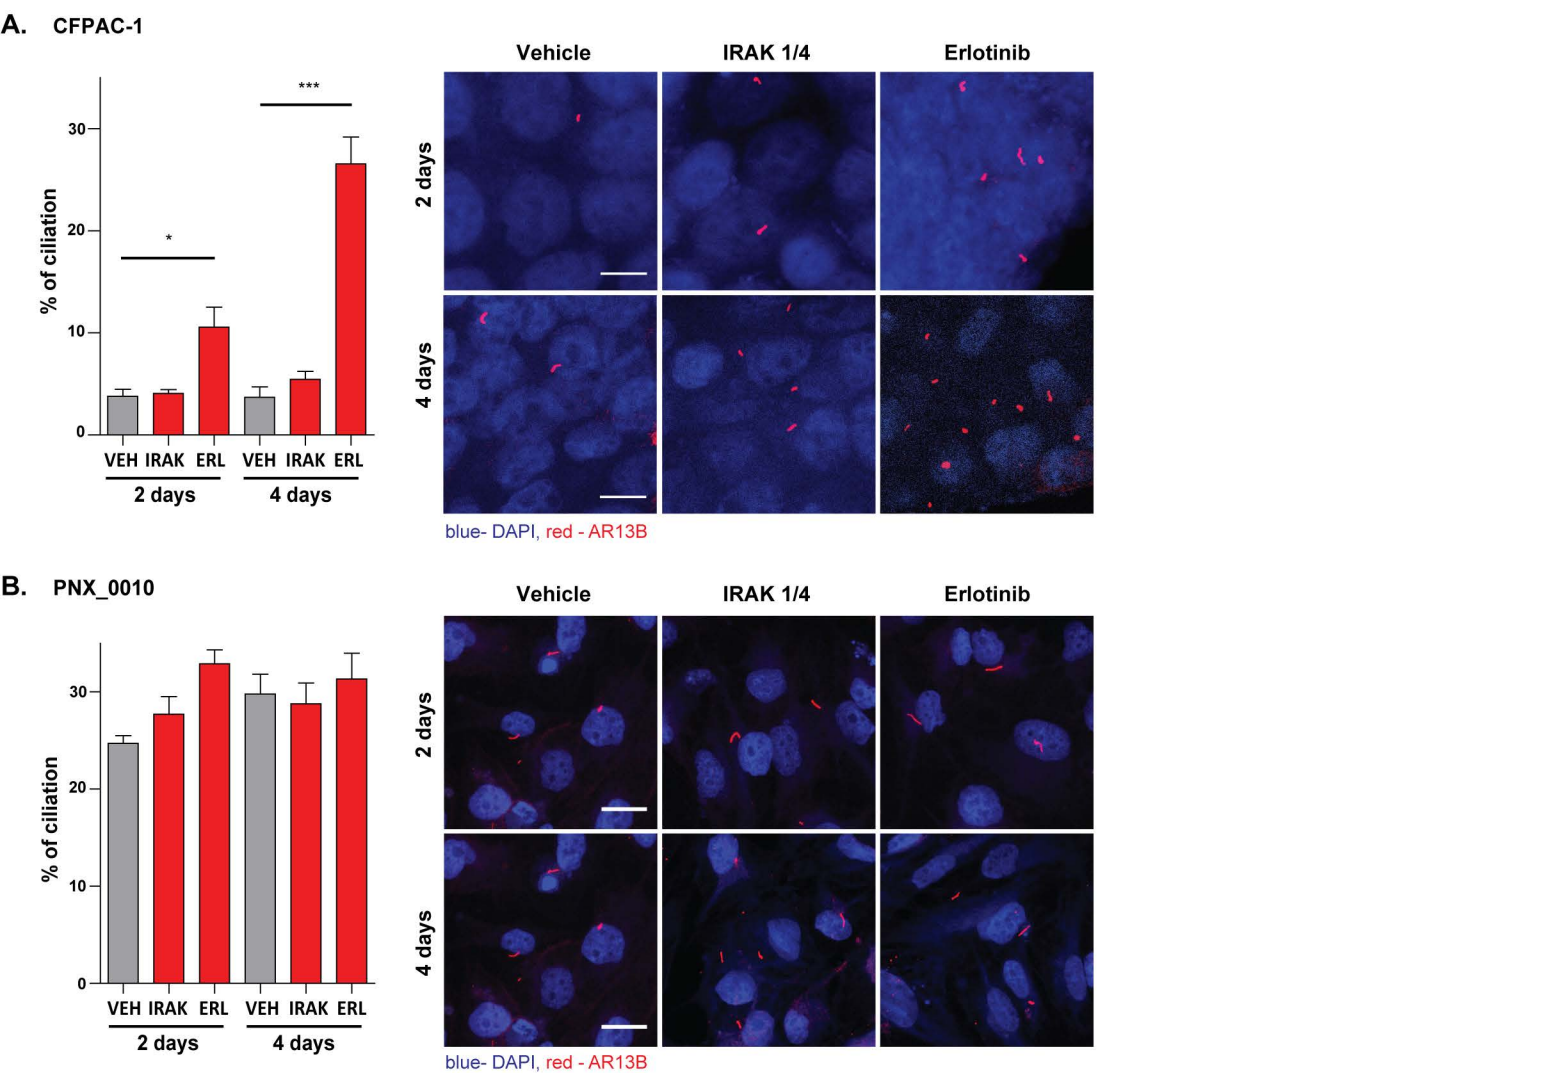

**Supplementary Figure S7. Erlotinib increases ciliation in CFPAC-1 but not in PN0010 cell line.** Ciliation rates and representative images of CFPAC-1 (A) and PN0010 (B) cell lines after 2 and 4 days incubation with IRAK1/4i or erlotinib. Red, ARL13B; blue, DAPI. Scale bar for (A) 10 μm, for (B) 20 μm. n≥750 cells, reflecting n≥250 from each of 3 independent experiments. Statistics determined by Tukey test in all cases; \*, p < 0.05; \*\*, p < 0.01; \*\*\*, p < 0.001, for each drug in serum versus no serum conditions.

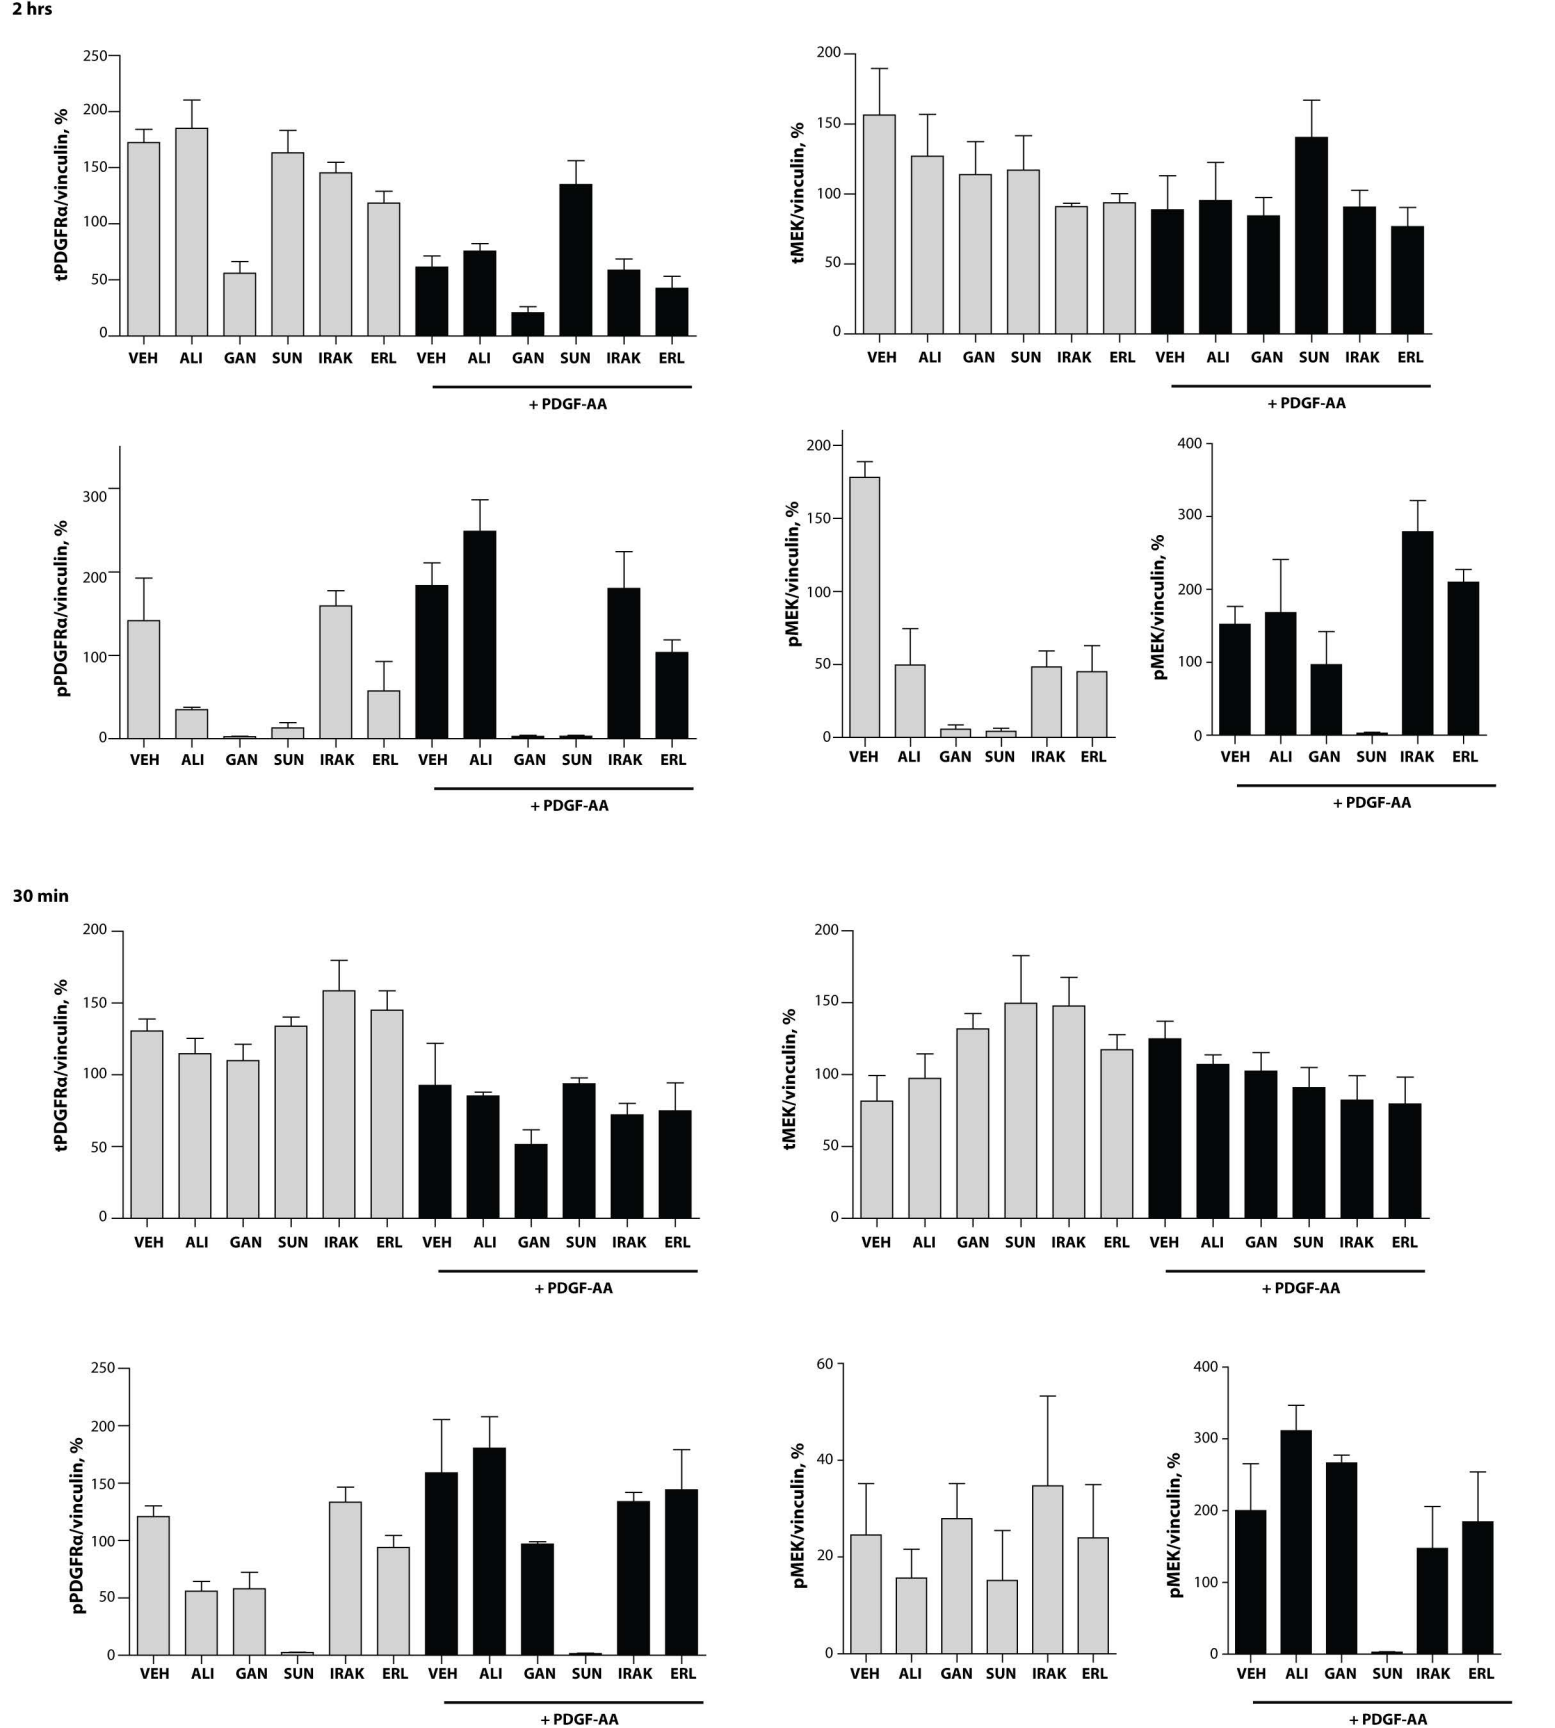

**Supplementary Figure S8. Sorafenib is similar to sunitinib in inducing ciliary resorption.** Representative Western blot images and quantitation of PDGF-AA-induced activation of PDGFR and MEK1/2 in NIH3T3 cells, related to **Figure 3F, G**. Cells were treated with indicated drugs for 2 h (top 4 panels) or 30 min (bottom 4 panels); values represent data normalized to vinculin loading control for phosphorylated and total protein, (n=3, n, number of biological replicates). Statistics determined by Tukey test in all cases; \*, p < 0.5; \*\*, p < 0.01; \*\*\*, p < 0.001, relative to vehicle, no ligand; #, p < 0.5; ##, p < 0.01; ###, p < 0.001, relative to vehicle, plus
